# Supplementary material for: Association of LPP and TAGAP Polymorphisms with Celiac Disease Risk: A Meta-Analysis
Source: MDPI journal article supplement (doi:10.3390/ijerph14020171), 2017-02-10
Supplement: s1 [file s1]

# Association of LPP and TAGAP Polymorphisms with Celiac Disease Risk: A Meta-Analysis

Shi-Qi Huang, Na Zhang, Zi-Xing Zhou, Chui-Can Huang, Cheng-Li Zeng, Di Xiao, Cong-Cong Guo, Ya-Jing Han, Xiao-Hong Ye, Xing-Guang Ye, Mei-Ling Ou, Bao-Huan Zhang, Yang Liu, Eddy Y. Zeng, Guang Yang and Chun-Xia Jing

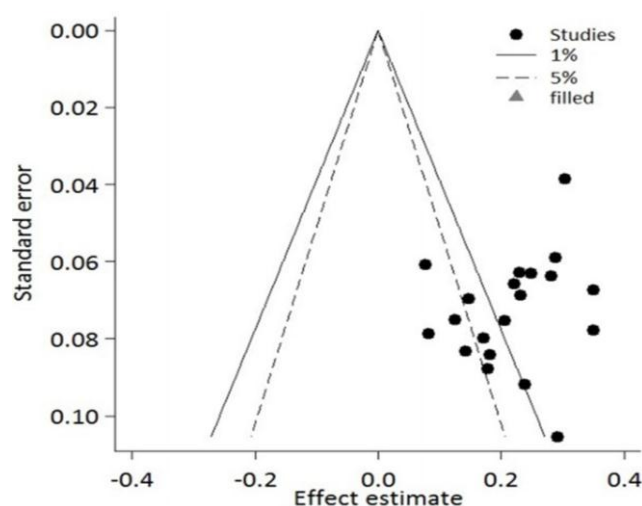

Figure S1. Funnel plot for LPP rs1464510 (A vs. C) with CD.

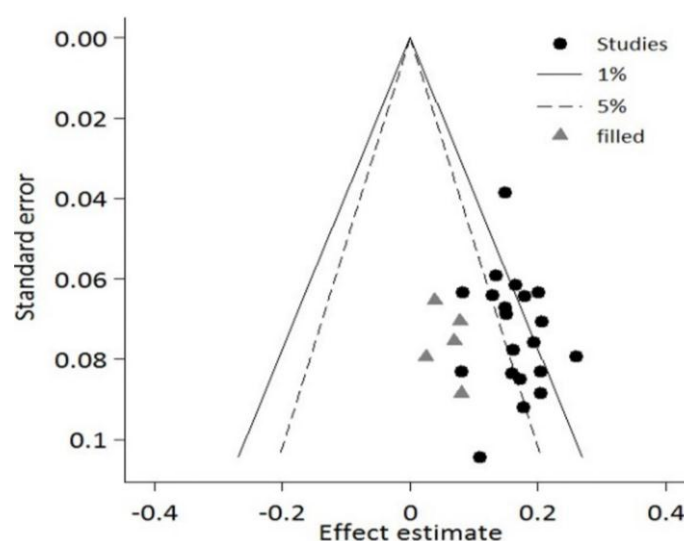

Figure S2. Funnel plot for TAGAP rs1738074 (A vs. G) with CD.

Table S1. Risk of bias assessment for genetic association studies of CD of studies included in the meta-analysis.

| Domain and Item                                         | Low Risk of Bias |
|---------------------------------------------------------|------------------|
| Information bias                                        |                  |
| Ascertainment of CD                                     |                  |
| Clearly described objective criteria of diagnosis of CD | Yes              |
| Not clearly identified                                  | No               |
| Did not mention                                         | Unclear          |
| Ascertainment of controls                               |                  |
| Controls were non-CD and without family history         | No               |
| Mentioned the sources of controls                       | Yes              |
| Not described                                           | Unclear          |
| Ascertainment of genotyping examination                 |                  |

|                                                                                                                                                    |         |
|----------------------------------------------------------------------------------------------------------------------------------------------------|---------|
| Genotyping done under “blind” conditions of case specimens and control specimens                                                                   | Yes     |
| Genotyping of cases and controls was performed together                                                                                            | Yes     |
| Genotyping error rate < 5%                                                                                                                         | Yes     |
| Quality control procedure (e.g., reanalysis of random specimens, by using different genotyping methods for analysis, analysis if replicate sample) | Yes     |
| Unblind                                                                                                                                            | No      |
| Genotyping error rate > 5%                                                                                                                         | No      |
| Did not mention what was done                                                                                                                      | Unclear |
| Confounding bias                                                                                                                                   |         |
| Population stratification                                                                                                                          |         |
| No difference in ethnic origin between cases and controls                                                                                          | Yes     |
| Use of controls who were not related to cases with clearly identification                                                                          | Yes     |
| Use of some controls who came from the same family                                                                                                 | No      |
| No report of what was done                                                                                                                         | Unclear |
| Other confounding bias                                                                                                                             |         |
| Controls for confounding variables (e.g., age, gender, or BMI) in analysis                                                                         | Yes     |
| Not controlled for confounding variables                                                                                                           | No      |
| Not mentioned                                                                                                                                      | Unclear |
| Selective reporting (for replication studies)                                                                                                      |         |
| Reported results of all polymorphisms mentioned in the objectives, no significant or not                                                           | Yes     |
| Reported results of only significant polymorphisms                                                                                                 | No      |
| HWE                                                                                                                                                |         |
| HWE in the control group                                                                                                                           | Yes     |
| HWD in the control group                                                                                                                           | No      |
| HWE not checked or mentioned                                                                                                                       | No      |

---

**Table S2.** MOOSE checklist: The association of *LPP* and *TAGAP* genes with CD risks: a meta-analysis.

| Criteria                                                                                                     | Brief Description of How the Criteria were Handled in the Review                                                                                                                                                                                                                                          |
|--------------------------------------------------------------------------------------------------------------|-----------------------------------------------------------------------------------------------------------------------------------------------------------------------------------------------------------------------------------------------------------------------------------------------------------|
| Reporting of background                                                                                      |                                                                                                                                                                                                                                                                                                           |
| ✓ Problem definition                                                                                         | The epidemiology of celiac disease.                                                                                                                                                                                                                                                                       |
| ✓ Hypothesis statement                                                                                       | The conflict results of genetic risk with celiac disease in different population based studies.<br>We propose there are associations between gene polymorphisms <i>LPP</i> rs1464510 and <i>TAGAP</i> rs1738074 and celiac disease.                                                                       |
| ✓ Description of study outcomes                                                                              | The pooled OR and 95% confidence interval                                                                                                                                                                                                                                                                 |
| ✓ Type of exposure                                                                                           | Genetic markers                                                                                                                                                                                                                                                                                           |
| ✓ Type of study designs used                                                                                 | The population based genetic epidemiological observational studies of celiac disease.                                                                                                                                                                                                                     |
| ✓ Study population                                                                                           | The populations from the whole world are all is considered our analysis.                                                                                                                                                                                                                                  |
| Reporting of search strategy should include                                                                  |                                                                                                                                                                                                                                                                                                           |
| ✓ Qualifications of searchers                                                                                | Two reviewers independently went through all titles and abstracts of the identified studies.<br>Time period: from inception of PubMed, Web of Science and Embase up to October 2016.                                                                                                                      |
| ✓ Search strategy, including time period included in the synthesis and keywords                              | Search strategy:<br>((( <i>LPP</i> or 3q28 or rs1464510 or “lipoma preferred partner”) or “lim domain containing preferred translocation protein”) and celiac disease) and celiac disease) or (( <i>TAGAP</i> or 6p25 or rs1738074 or “T-cell activation GTPase activating protein”) AND celiac disease). |
| ✓ Databases and registries searched                                                                          | PubMed, Web of Science and Embase                                                                                                                                                                                                                                                                         |
| ✓ Search software used, name and version, including special features                                         | PubMed, was accessed from the National Library of Medicine (free), Web of Science is available on the website of Jinan University Library, Embase is purchased in internet.                                                                                                                               |
| ✓ Use of hand searching                                                                                      | We searched bibliographies of retrieved papers and those of previous reviewers on the subject were examined for further relevant studies.                                                                                                                                                                 |
| ✓ List of citations located and those excluded, including justifications                                     | Details of the literature search process are outlined in the flow chart. The citation list for excluded studies is available upon request.                                                                                                                                                                |
| ✓ Method of addressing articles published in languages other than English                                    | We had a restriction on language; our searching was limited to English.                                                                                                                                                                                                                                   |
| ✓ Method of handling abstracts and unpublished studies                                                       | We included proceedings papers and assessed them for eligibility according to our inclusion and exclusion criteria. Unpublished studies were excluded in our analysis.                                                                                                                                    |
| ✓ Description of any contact with authors                                                                    | It is applicable; we contact the authors when we needed.                                                                                                                                                                                                                                                  |
| Reporting of methods should include                                                                          |                                                                                                                                                                                                                                                                                                           |
| ✓ Description of relevance or appropriateness of studies assembled for assessing the hypothesis to be tested | Detailed inclusion and exclusion criteria are described in the Methods section.                                                                                                                                                                                                                           |

|                                                                                                                                              |                                                                                                                                                                                                                                                                                                                                                      |
|----------------------------------------------------------------------------------------------------------------------------------------------|------------------------------------------------------------------------------------------------------------------------------------------------------------------------------------------------------------------------------------------------------------------------------------------------------------------------------------------------------|
| ✓ Rationale for the selection and coding of data                                                                                             | Data extracted from each of the studies were relevant to the population characteristics name of first author, year of publication, region of study population, source of controls, genotype method, diagnostic criteria, the number of cases and controls, the risk allele frequency in cases and controls, and the Hard-Weinberg Equilibrium (HWE). |
| ✓ Assessment of confounding                                                                                                                  | Detailed inclusion is described in the Methods section.                                                                                                                                                                                                                                                                                              |
| ✓ Assessment of study quality, including blinding of quality assessors; stratification or regression on possible predictors of study results | Sensitivity analyses by several quality indicators such as study size, study objects' ethnic, and another influent factors, in the Methods section.                                                                                                                                                                                                  |
| ✓ Assessment of heterogeneity                                                                                                                | Heterogeneity of the studies was explored with $I^2$ statistic that provides the relative amount of variance of the summary effect due to the between-study heterogeneity, detailed inclusion is described in the Methods section.                                                                                                                   |
| ✓ Description of statistical methods in sufficient detail to be replicated                                                                   | Description of methods of meta-analyses, sensitivity analyses, meta-regression and assessment of publication bias are detailed in the methods. We performed fixed effects and random effects meta-analysis with Stata (Ver. 12) and the Comprehensive Meta-Analysis software (Ver. 12).                                                              |
| ✓ Provision of appropriate Tables and graphics                                                                                               | Tables 1–4, Figures 1–3, Tables S1–S3, Figures S1 and S2                                                                                                                                                                                                                                                                                             |
| <hr/>                                                                                                                                        |                                                                                                                                                                                                                                                                                                                                                      |
| Reporting of results should include                                                                                                          |                                                                                                                                                                                                                                                                                                                                                      |
| ✓ Graph summarizing individual study estimates and overall estimate                                                                          | Figure 2 and Figure 3                                                                                                                                                                                                                                                                                                                                |
| ✓ Table giving descriptive information for each study included                                                                               | Table 1                                                                                                                                                                                                                                                                                                                                              |
| ✓ Results of sensitivity testing                                                                                                             | Table S3                                                                                                                                                                                                                                                                                                                                             |
| ✓ Indication of statistical uncertainty of findings                                                                                          | 95% confidence intervals were presented with all summary estimates, $I^2$ values and results of sensitivity analyses.                                                                                                                                                                                                                                |
| <hr/>                                                                                                                                        |                                                                                                                                                                                                                                                                                                                                                      |
| Reporting of discussion should include                                                                                                       |                                                                                                                                                                                                                                                                                                                                                      |
| ✓ Quantitative assessment of bias                                                                                                            | The forest plot and Egg's regression.                                                                                                                                                                                                                                                                                                                |
| ✓ Justification for exclusion                                                                                                                | All studies were excluded based on the pre-defined inclusion criteria in methods section.                                                                                                                                                                                                                                                            |
| ✓ Assessment of quality of included studies                                                                                                  | Brief discussion included in Methods section.                                                                                                                                                                                                                                                                                                        |
| <hr/>                                                                                                                                        |                                                                                                                                                                                                                                                                                                                                                      |
| Reporting of conclusions should include                                                                                                      |                                                                                                                                                                                                                                                                                                                                                      |
| ✓ Consideration of alternative explanations for observed results                                                                             | Discussed in the context of the results.                                                                                                                                                                                                                                                                                                             |
| ✓ Generalization of the conclusions                                                                                                          | Discussed in the context of the results.                                                                                                                                                                                                                                                                                                             |
| ✓ Guidelines for future research                                                                                                             | We recommend analyses that would correct for regression dilution bias.                                                                                                                                                                                                                                                                               |
| ✓ Disclosure of funding source                                                                                                               | No separate funding was necessary for the undertaking of this systematic review.                                                                                                                                                                                                                                                                     |
| <hr/>                                                                                                                                        |                                                                                                                                                                                                                                                                                                                                                      |

**Table S3.** The sensitivity analysis of *LPP* rs1464510 and CD risk (A vs. C).

| Excluded Study            | Country         | Pooled OR | 95% CI    | <i>p</i> | I <sup>2</sup> (%) | <i>p</i> -Value for I <sup>2</sup> |
|---------------------------|-----------------|-----------|-----------|----------|--------------------|------------------------------------|
| Plaza-Izurieta et al. [7] | Spain           | 1.26      | 1.23–1.30 | <0.001   | 29.86              | 0.126                              |
| Sperandeo et al. [31]     | Italy           | 1.25      | 1.21–1.29 | <0.001   | 26.38              | 0.141                              |
|                           | UK 1            | 1.25      | 1.21–1.29 | <0.001   | 30.34              | 0.103                              |
|                           | UK 2            | 1.24      | 1.20–1.28 | <0.001   | 19.77              | 0.213                              |
|                           | Finland 1       | 1.26      | 1.22–1.30 | <0.001   | 33.20              | 0.080                              |
|                           | The Netherlands | 1.26      | 1.23–1.30 | <0.001   | 29.51              | 0.111                              |
| Dubois et al. [8]         | Italy 1         | 1.26      | 1.22–1.30 | <0.001   | 32.38              | 0.086                              |
|                           | USA             | 1.26      | 1.22–1.30 | <0.001   | 32.98              | 0.082                              |
|                           | Hungary         | 1.26      | 1.22–1.30 | <0.001   | 33.23              | 0.080                              |
|                           | Ireland         | 1.26      | 1.22–1.30 | <0.001   | 33.30              | 0.080                              |
|                           | Poland          | 1.26      | 1.22–1.30 | <0.001   | 31.88              | 0.090                              |
|                           | Spain           | 1.26      | 1.22–1.30 | <0.001   | 33.20              | 0.080                              |
|                           | Italy 2         | 1.25      | 1.21–1.29 | <0.001   | 23.60              | 0.170                              |
|                           | Finland 2       | 1.26      | 1.22–1.30 | <0.001   | 32.32              | 0.087                              |
| Coenen et al. [30]        | The Netherlands | 1.27      | 1.23–1.31 | <0.001   | 11.63              | 0.312                              |
| Romanos et al. [33]       | Italy           | 1.26      | 1.22–1.30 | <0.001   | 32.44              | 0.086                              |
|                           | UK              | 1.25      | 1.22–1.29 | <0.001   | 31.34              | 0.095                              |
| Hunt et al. [9]           | Ireland         | 1.26      | 1.22–1.30 | <0.001   | 30.31              | 0.104                              |
|                           | The Netherlands | 1.27      | 1.23–1.30 | <0.001   | 22.92              | 0.177                              |
| Van Heel et al. [10]      | UK              | 1.26      | 1.22–1.30 | <0.001   | 32.98              | 0.082                              |

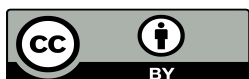

© 2017 by the authors. Submitted for possible open access publication under the terms and conditions of the Creative Commons Attribution (CC-BY) license (<http://creativecommons.org/licenses/by/4.0/>).
